# Supplementary material for: Bulk and transparent supramolecular glass from evaporation-induced noncovalent polymerization of nucleosides
Source: Royal Society of Chemistry journal article supplement (doi:10.1039/d3mh01220d), 2023-01-01
Supplement: d3mh01220d1.pdf [file d3mh01220d1.pdf]

## Supporting Information

### **Bulk and transparent supramolecular glass from evaporation-induced noncovalent polymerization of nucleosides**

Shuanggen Wu,<sup>a,b</sup> Changyong Cai,<sup>a</sup> Xunqiu Wang,<sup>b</sup> Qiao Zhang,<sup>a</sup> Zhijian Tan,<sup>\*c</sup> Fenfang Li<sup>d</sup> and Shengyi Dong<sup>\*a</sup>

<sup>a</sup>College of Chemistry and Chemical Engineering, Hunan University, Changsha 410082, Hunan, P. R. China.

<sup>b</sup>School of Chemical Engineering, Zhengzhou University, Zhengzhou 450001, Henan, P. R. China.

<sup>c</sup>Institute of Bast Fiber Crops, Chinese Academy of Agricultural Sciences, Changsha 410205, Hunan, P. R. China.

<sup>d</sup>College of Chemistry and Chemical Engineering, Central South University, Changsha 410083, Hunan, P. R. China.

\*Corresponding author. E-mail: [tanzhijian@caas.cn](mailto:tanzhijian@caas.cn); [dongsy@hnu.edu.cn](mailto:dongsy@hnu.edu.cn)

## Table of Content

|                                                                         |     |
|-------------------------------------------------------------------------|-----|
| 1. Contact angle measurements of <b>BSGs</b> .....                      | S1  |
| 3. Atomic force microscopy (AFM) of <b>BSGs</b> .....                   | S2  |
| 4. Nanoindentation testing of <b>BSGs</b> .....                         | S3  |
| 5. Dynamic thermomechanical analysis (DMA) of <b>BSGs</b> .....         | S3  |
| 6. Long-term stability of <b>BSGs</b> .....                             | S4  |
| 7. Rheology measurements of <b>BSGs</b> .....                           | S9  |
| 8. <sup>1</sup> H NMR spectra of <b>BSGs</b> .....                      | S10 |
| 9. Raman spectra of <b>BSGs</b> .....                                   | S12 |
| 10. Fourier-Transform infrared (FT-IR) spectra of <b>BSGs</b> .....     | S12 |
| 11. Two-dimensional infrared correlation spectra of <b>BSGs</b> .....   | S13 |
| 12. Density Functional Theory (DFT) simulations .....                   | S14 |
| 13. Powder X-Ray Diffraction (PXRD) pattern of <b>BSGs</b> .....        | S15 |
| 14. X-ray photoelectron spectroscopy (XPS) spectra of <b>BSGs</b> ..... | S16 |
| 15. Molecular dynamic (MD) simulations .....                            | S17 |

## 1. Contact angle measurements of BSGs

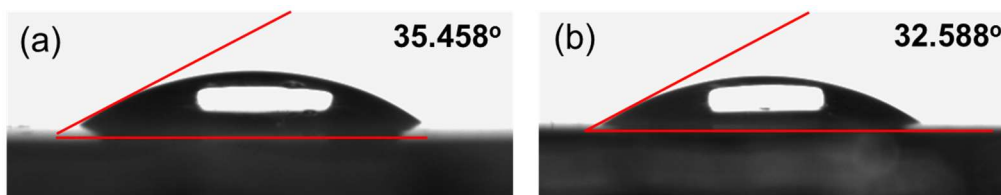

**Figure S1.** Contact angles of BSGs with water. The contact angles of (a) UD and (b) TD.

## 2. Optical microscope measurements of BSGs

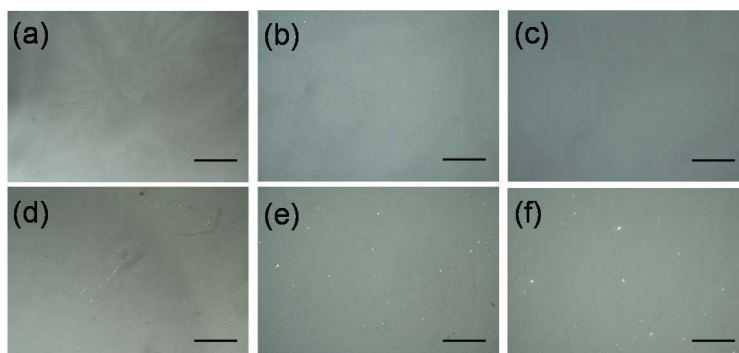

**Figure S2.** Optical microscope images of BSGs. (a–c) TD. (d–e) UD. Scale bar represent 20, 10, and 5  $\mu\text{m}$  from left to right, respectively.

### 3. Atomic force microscopy (AFM) of BSGs

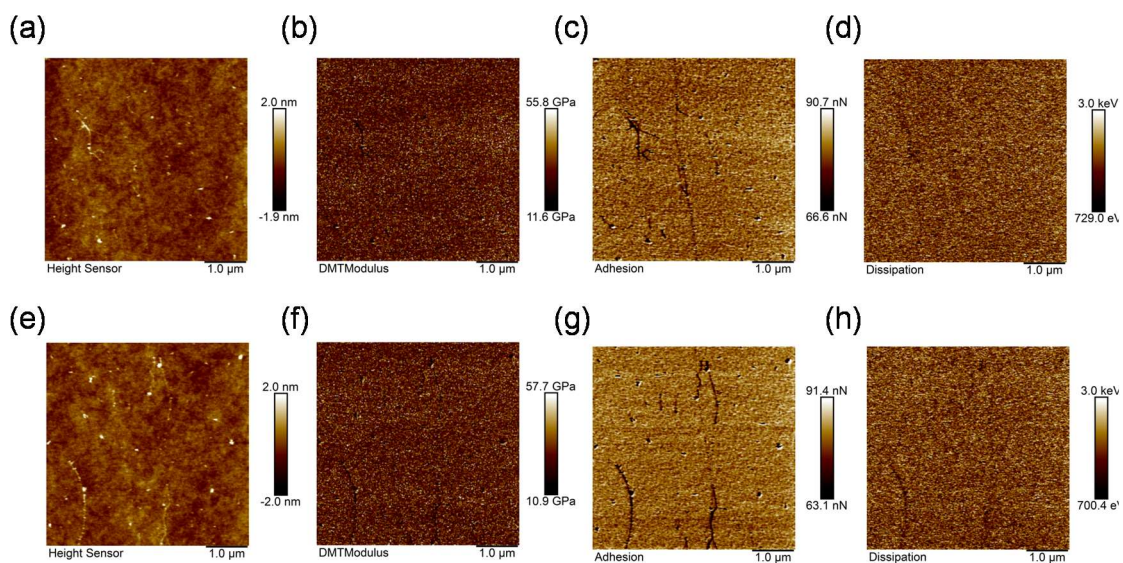

**Figure S3.** AFM phase images of TD.

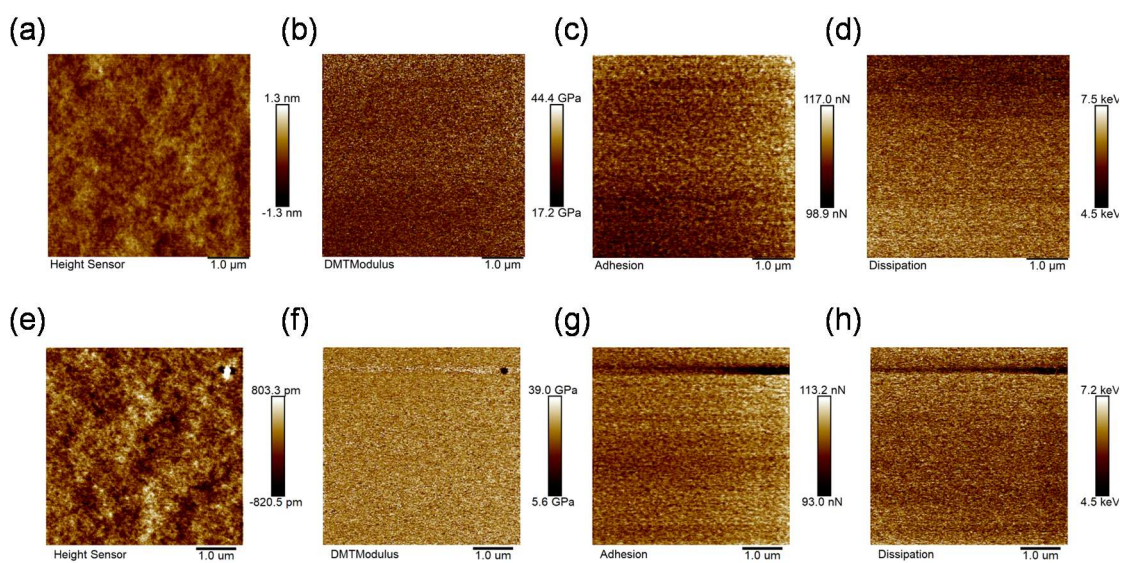

**Figure S4.** AFM phase images of UD.

#### 4. Nanoindentation testing of BSGs

**Table S1.** Elastic modulus and hardness of BSGs.

| BSGs      | Elastic modulus (GPa) | Hardness (GPa)      |
|-----------|-----------------------|---------------------|
| <b>TD</b> | $5.87 \pm 0.47$       | $0.0613 \pm 0.0042$ |
| <b>UD</b> | $4.50 \pm 0.49$       | $0.0258 \pm 0.011$  |

These data were obtained from nanoindentation tests.

#### 5. Dynamic thermomechanical analysis (DMA) of BSGs

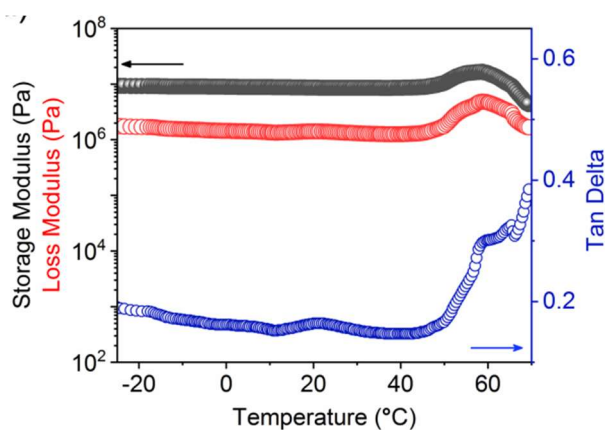

**Figure S5.** Temperature-dependent storage modulus, loss modulus, and  $\tan \delta$  of TD.

**Table S2.** Elastic modulus of BSGs obtained from different tests.

| Supramolecular<br>glass | Elastic modulus     |                     |                      |
|-------------------------|---------------------|---------------------|----------------------|
|                         | Tensile test        | Compression test    | Nanoindentation test |
| <b>TD</b>               | $4.94 \pm 0.32$ MPa | $58.7 \pm 3.11$ MPa | $5.87 \pm 0.47$ GPa  |
| <b>UD</b>               | $4.19 \pm 0.11$ MPa | $34.6 \pm 2.42$ MPa | $4.50 \pm 0.49$ GPa  |

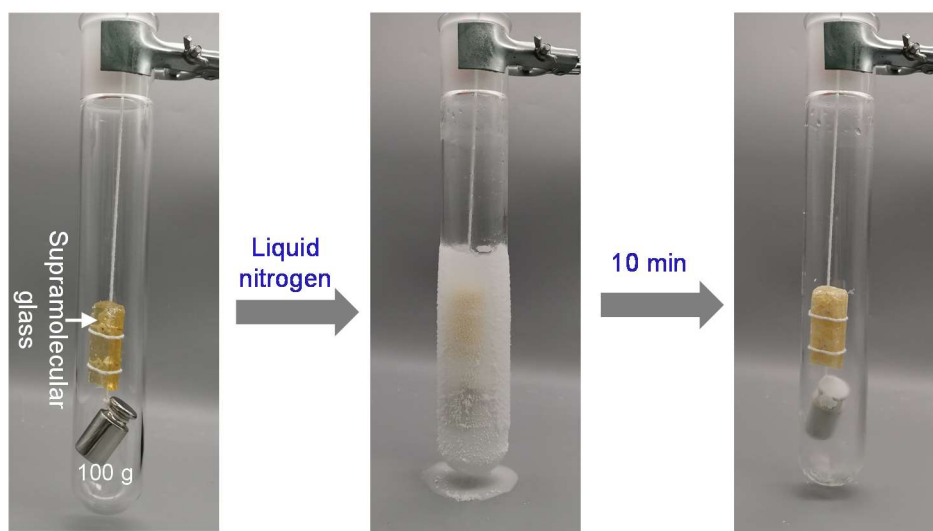

**Figure S6.** Macroscopic stretching behavior of TD in liquid nitrogen ( $50 \times 25 \times 10 \text{ mm}^3$ ).

## 6. Long-term stability of BSGs

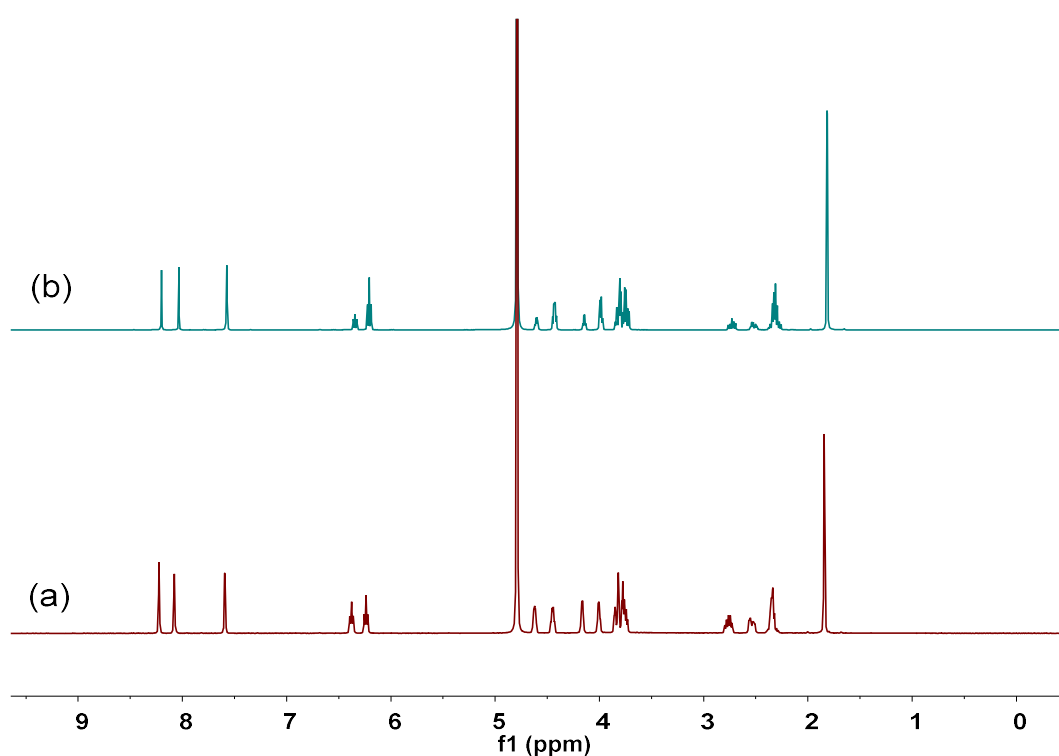

**Figure S7.** Time-dependent  $^1\text{H}$  NMR spectra (400 MHz,  $\text{D}_2\text{O}$ , room temperature) of TD: (a) 0 day, (b) 30 days.

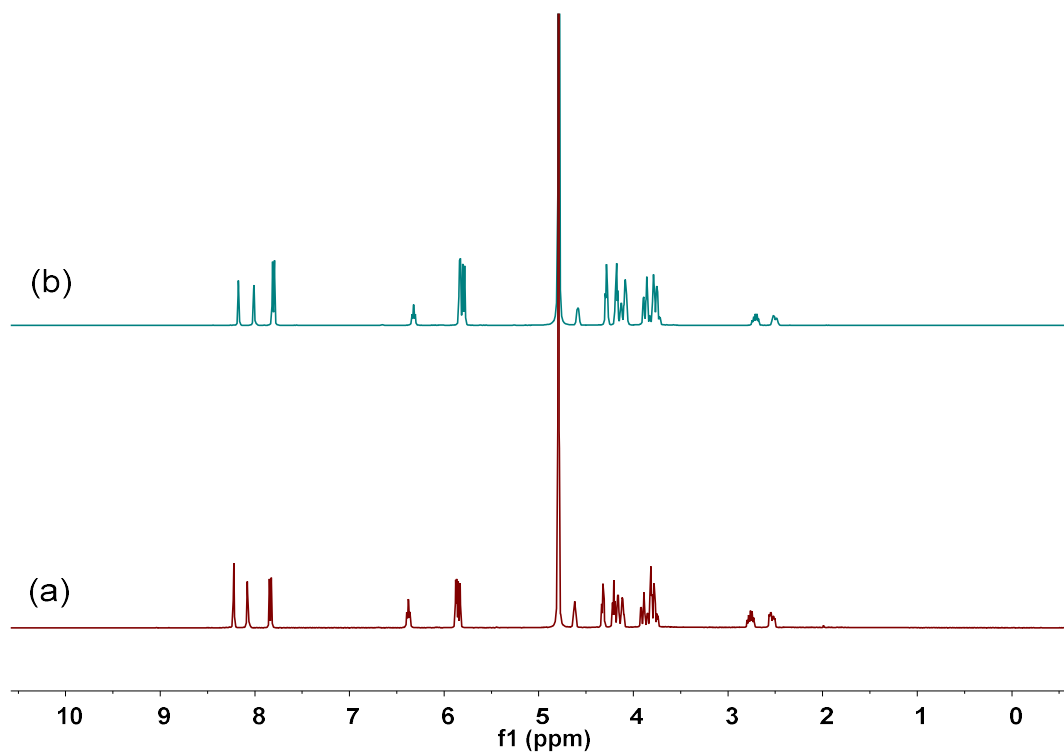

**Figure S8.** Time-dependent <sup>1</sup>H NMR spectra (400 MHz, D<sub>2</sub>O, room temperature) of UD: (a) 0 day, (b) 30 days.

No obvious changes in <sup>1</sup>H NMR spectra of **BSGs** were observed after 30 days, suggesting that **BSGs** have excellent structural stability.

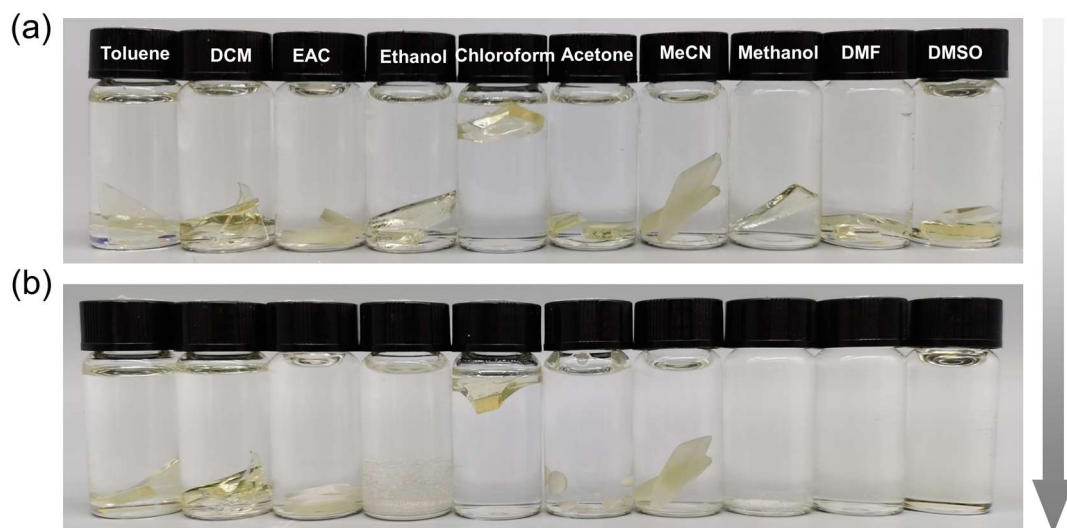

**Figure S9.** Time-dependent of **TD** soaked in different organic solvents: (a) 0 h; (b) 14 days. DCM, EAC, MeCN, DMF, DMSO represent dichloromethane, ethyl acetate, acetonitrile, N,N-dimethylformamide, dimethyl sulfoxide, respectively. DCM and EAC represent dichloromethane and ethyl acetate, respectively.

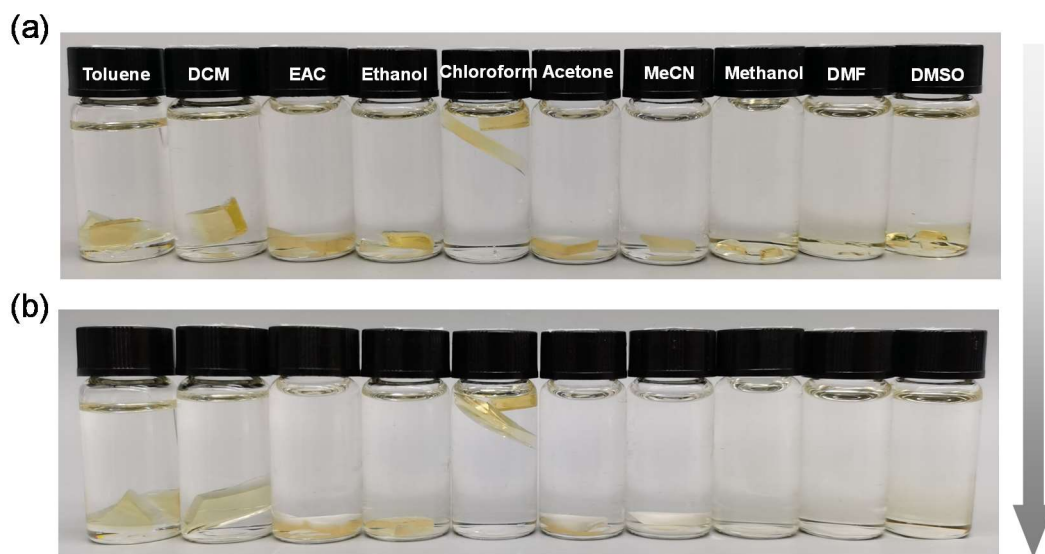

**Figure S10.** Time-dependent of **UD** soaked in different organic solvents: (a) 0 h; (b) 14 days. DCM, EAC, MeCN, DMF, DMSO represent dichloromethane, ethyl acetate, acetonitrile, N,N-dimethylformamide, dimethyl sulfoxide, respectively. DCM and EAC represent dichloromethane and ethyl acetate, respectively.



**Table S3.** Time-dependent transmittance of **TD** soaked in different organic solvents.

| Time<br>(h) | Relative transmittance (%) |      |     |         |            |         |              |
|-------------|----------------------------|------|-----|---------|------------|---------|--------------|
|             | Toluene                    | DCM  | EAC | Ethanol | Chloroform | Acetone | Acetonitrile |
| 0           | 100                        | 100  | 100 | 100     | 100        | 100     | 100          |
| 5           | 96.4                       | 99.1 | 8.5 | 6.9     | 96.1       | 3.4     | 3.0          |
| 24          | 95.4                       | 95.2 | 7.1 | 6.6     | 95.5       | 2.3     | 2.6          |
| 168         | 93.2                       | 93.4 | 6.9 | 5.4     | 94.4       | 0.8     | 2.4          |

DCM and EAC represent dichloromethane and ethyl acetate, respectively.

**Table S4.** Time-dependent transmittance of **UD** soaked in different organic solvents.

| Time<br>(h) | Relative transmittance (%) |      |     |         |            |         |              |
|-------------|----------------------------|------|-----|---------|------------|---------|--------------|
|             | Toluene                    | DCM  | EAC | Ethanol | Chloroform | Acetone | Acetonitrile |
| 0           | 100                        | 100  | 100 | 100     | 100        | 100     | 100          |
| 5           | 96.8                       | 97.7 | 3.9 | 3.0     | 98.9       | 4.3     | 4.9          |
| 24          | 96.6                       | 97.6 | 2.1 | 2.5     | 95.5       | 3.9     | 4.6          |
| 168         | 91.5                       | 90.4 | 1.8 | 2.2     | 94.8       | 2.6     | 4.0          |

DCM and EAC represent dichloromethane and ethyl acetate, respectively.

The stability of **BSGs** was evaluated in different organic solvents, including toluene, dichloromethane, ethyl acetate, ethanol, chloroform, acetone, acetonitrile, methanol, N,N-dimethylformamide, and dimethyl sulfoxide. **BSGs** can be dissolved in methanol, N,N-dimethylformamide, and dimethyl sulfoxide. The phase separations of **BSGs** were observed in ethyl acetate, ethanol, acetone, and acetonitrile. No obvious changes in transmittance of **BSGs** were observed in toluene, dichloromethane, and chloroform. These results show that **BSGs** exhibit good transmittance in low-polarity solvents. Meanwhile, after storing at 30% RH for 7 days,

**BSGs** still displayed high values of transmittance ( $> 85\%$ ).

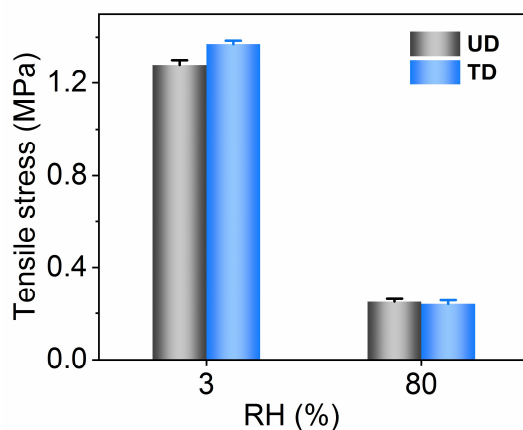

**Figure S11.** Relative humidity-dependent tensile stress of **UD** and **TD**.

**Table S5.** Time-dependent hardness of **TD** at different humidities.

| Time (h) | Shore hardness (HD) |            |             |
|----------|---------------------|------------|-------------|
|          | 5% RH               | 30% RH     | 80% RH      |
| 24       | $31 \pm 1$          | $29 \pm 2$ | $2.1 \pm 1$ |
| 168      | $30 \pm 3$          | $30 \pm 1$ | $1.8 \pm 3$ |

The freshly prepared **TD** has the HD at  $32 \pm 2$ .

**Table S6.** Time-dependent hardness of **UD** at different humidities.

| Time (h) | Shore hardness (HD) |            |             |
|----------|---------------------|------------|-------------|
|          | 5% RH               | 30% RH     | 80% RH      |
| 24       | $34 \pm 1$          | $28 \pm 1$ | $4.1 \pm 1$ |
| 168      | $32 \pm 1$          | $28 \pm 2$ | $1.2 \pm 3$ |

The freshly prepared **UD** has the HD at  $36 \pm 3$ .

The mechanical properties of **BSGs** were measured at different relative humidity (RH). Good tensile strength and high hardness of **TD** and **UD** were found under at 3% and 30% RH for 7 days (Fig. S11 and Table S5,6), indicating that the mechanical

performances of **BSGs** are stable at low-humidity environment. In contrast, **BSGs** exhibit poor mechanical properties at high-humidity environment (80% RH). A possible explanation is that a large amount of water molecules absorbed from the high-moisture environment can destroy inter-chain hydrogen bonds and induce the phase separation.

## 7. Rheology measurements of BSGs

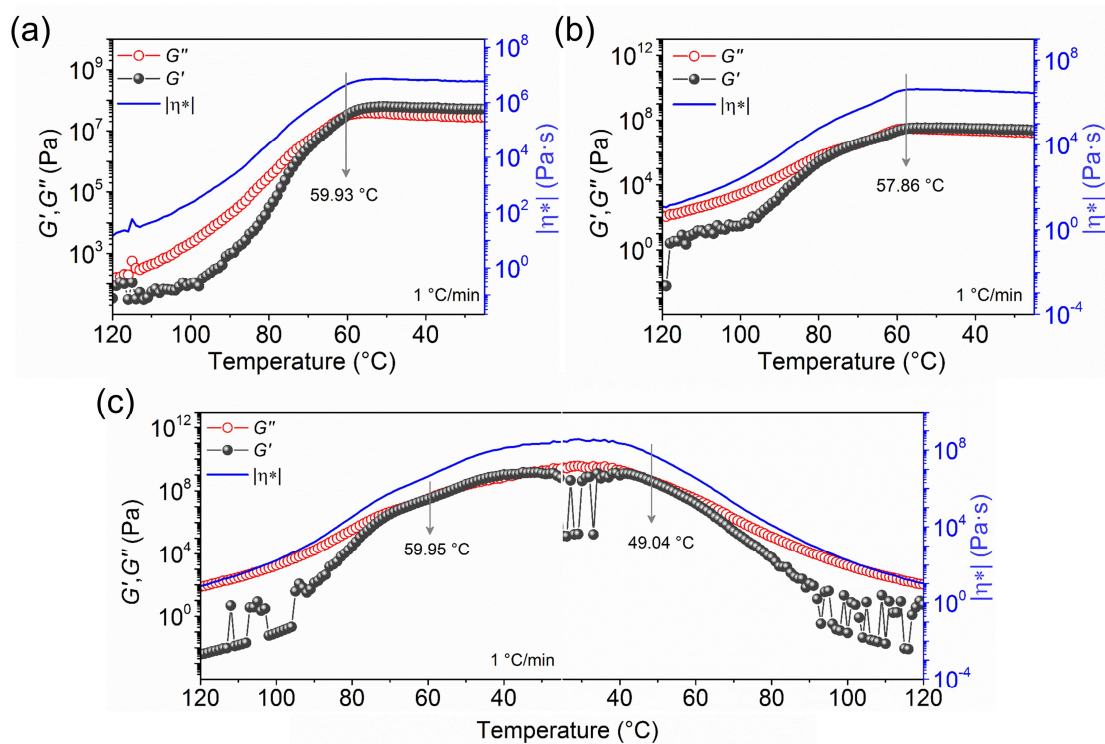

**Figure S12.** Rheological tests of **BSGs**. (a) Storage modulus ( $G'$ ), loss modulus ( $G''$ ), and composite viscosity ( $|\eta^*|$ ) values of **TD** at 1.0  $^{\circ}\text{C}/\text{min}$ . (b)  $G'$ ,  $G''$ , and  $|\eta^*|$  value of **UD** at 1.0  $^{\circ}\text{C}/\text{min}$ . (c)  $G'$ ,  $G''$ , and  $|\eta^*|$  value of **TD** at reversible temperature-dependent rheological tests.

## 8. $^1\text{H}$ NMR spectra of BSGs

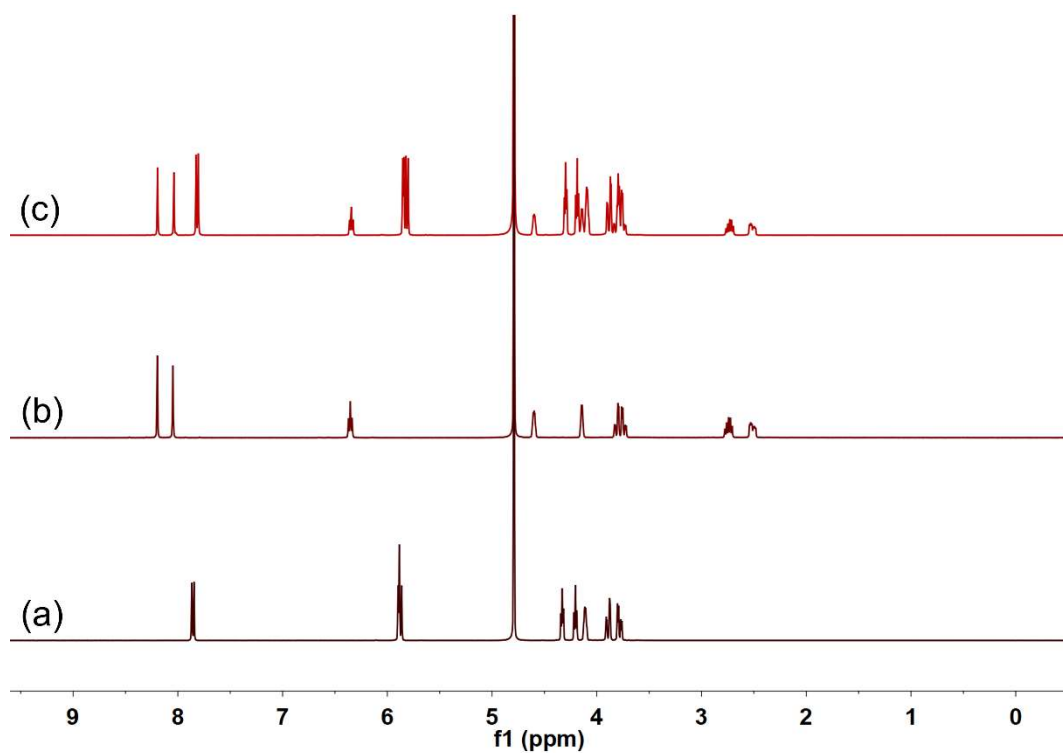

**Figure S13.**  $^1\text{H}$  NMR spectra (400 MHz,  $\text{D}_2\text{O}$ , room temperature). (a) U. (b) D. (c) UD.

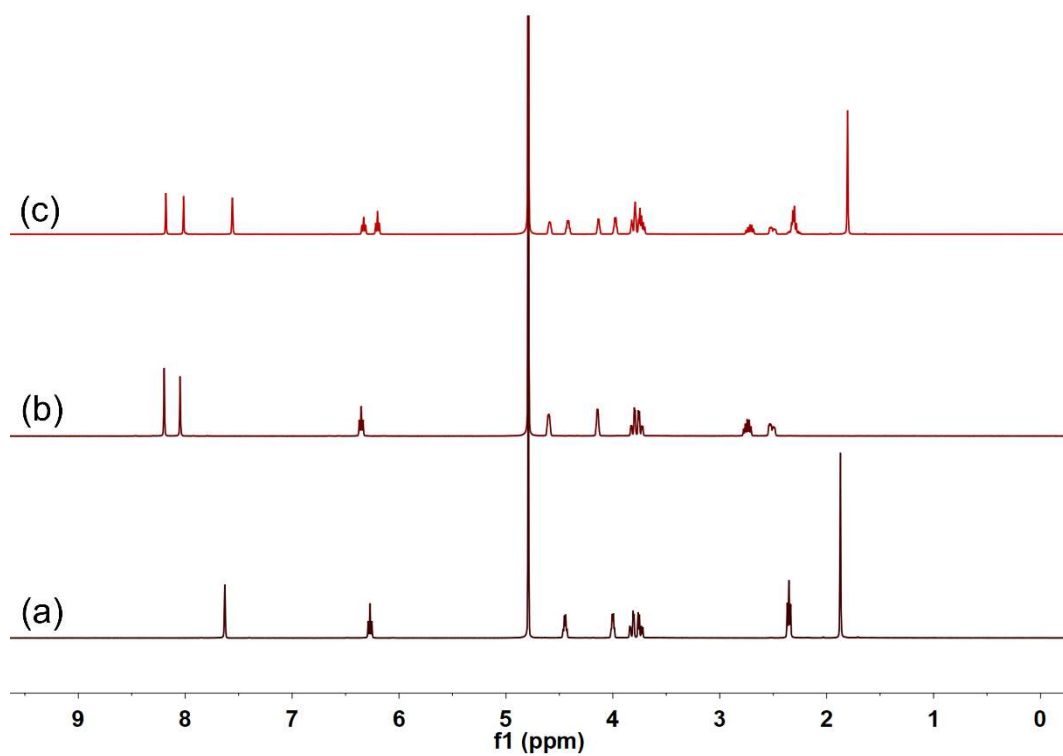

**Figure S14.**  $^1\text{H}$  NMR spectra (400 MHz,  $\text{D}_2\text{O}$ , room temperature). (a) T. (b) D. (c) C.

**TD.**

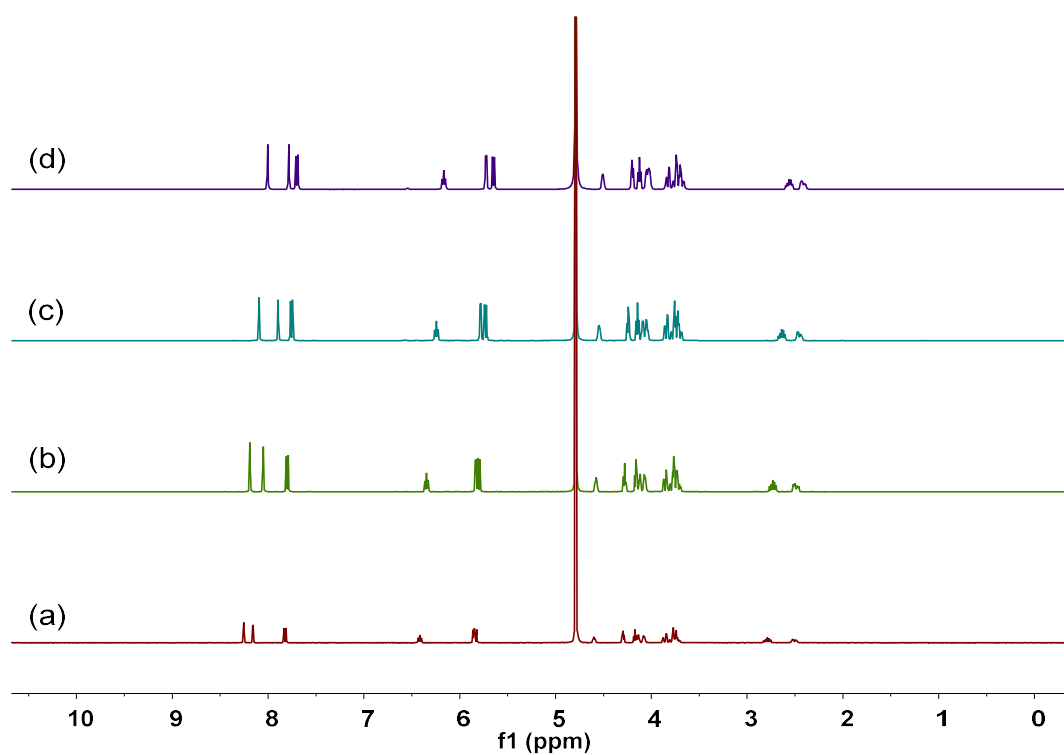

**Figure S15.** Concentration-dependent  $^1\text{H}$  NMR spectra (400 MHz,  $\text{D}_2\text{O}$ , room temperature) of **UD**. (a) 4.0 mg/mL. (b) 20 mg/mL. (c) 100 mg/mL. (d) 300 mg/mL.

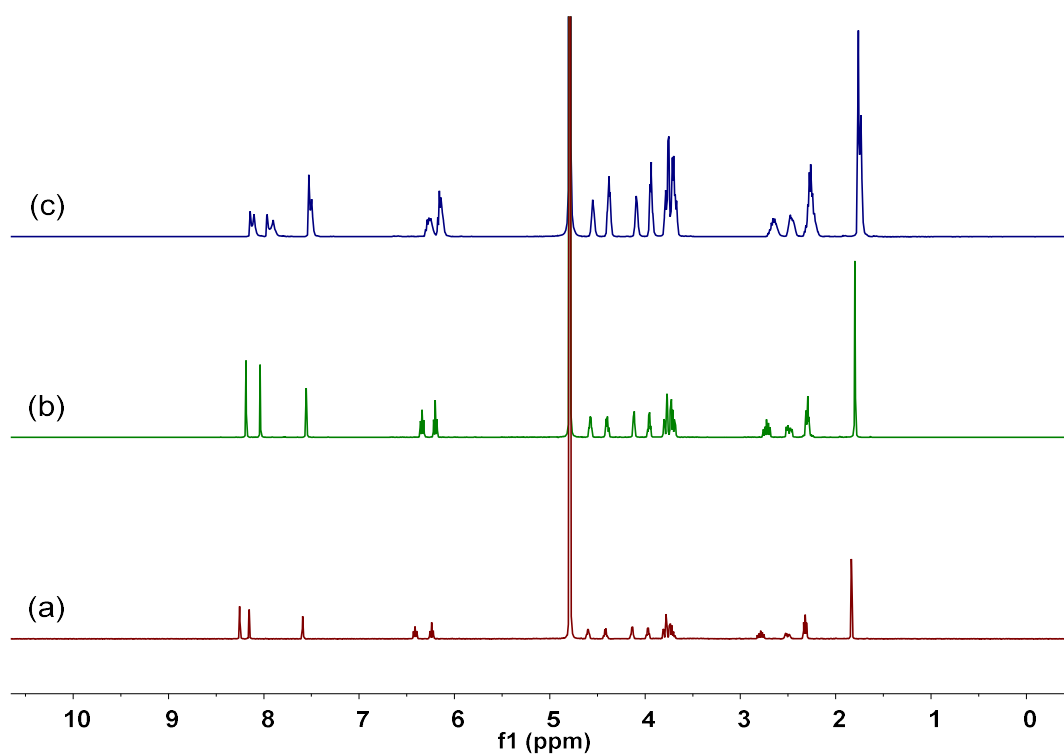

**Figure S16.** Concentration-dependent  $^1\text{H}$  NMR spectra (400 MHz,  $\text{D}_2\text{O}$ , room temperature) of **TD**. (a) 4.0 mg/mL. (b) 20 mg/mL. (c) 100 mg/mL.

## 9. Raman spectra of BSGs

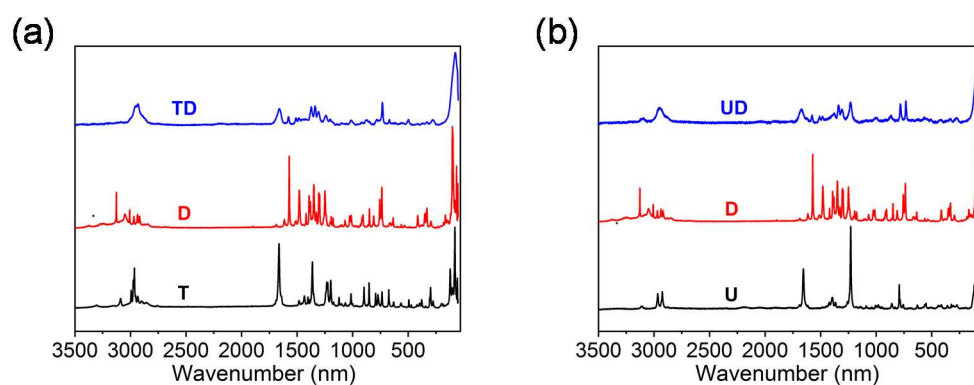

**Figure S17.** Raman spectra of nucleosides and BSGs. (a) Raman spectra of T, D, and TD. (b) Raman spectra of U, D, and UD.

## 10. Fourier-Transform infrared (FT-IR) spectra of BSGs

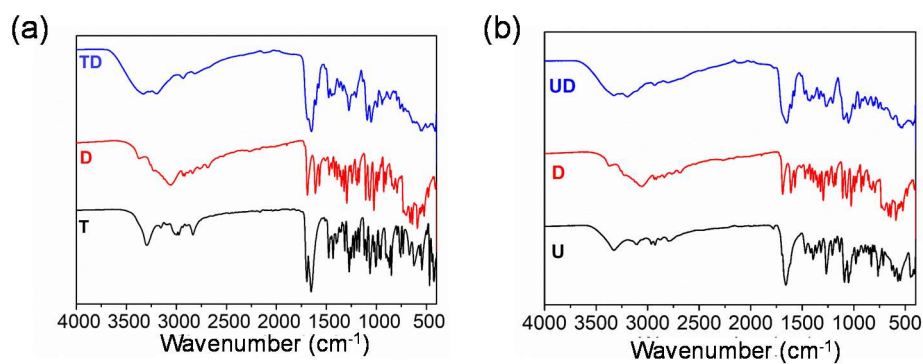

**Figure S18.** FT-IR spectra of nucleosides and BSGs. (a) FT-IR spectra of T, D, and TD. (b) FT-IR spectra of U, D, and UD.

## 11. Two-dimensional infrared correlation spectra of BSGs

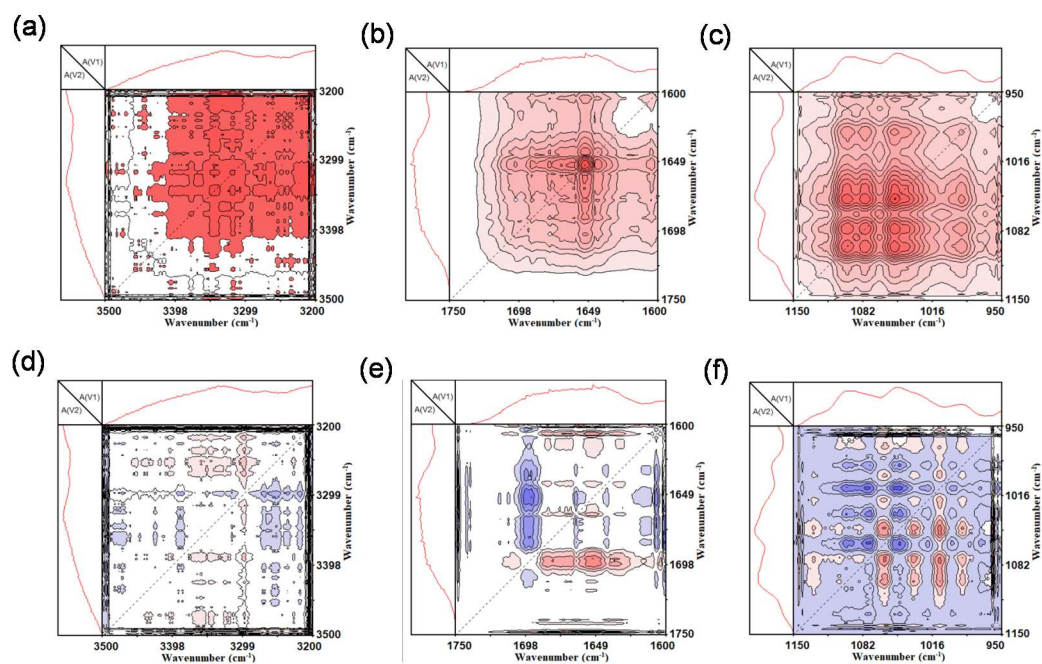

**Figure S19.** Synchronous and asynchronous correlation spectra of **TD** during heating from 20 to 100 °C. (a–c) Synchronous correlation spectra of **TD**. (d–f) Asynchronous correlation spectra of **TD**.

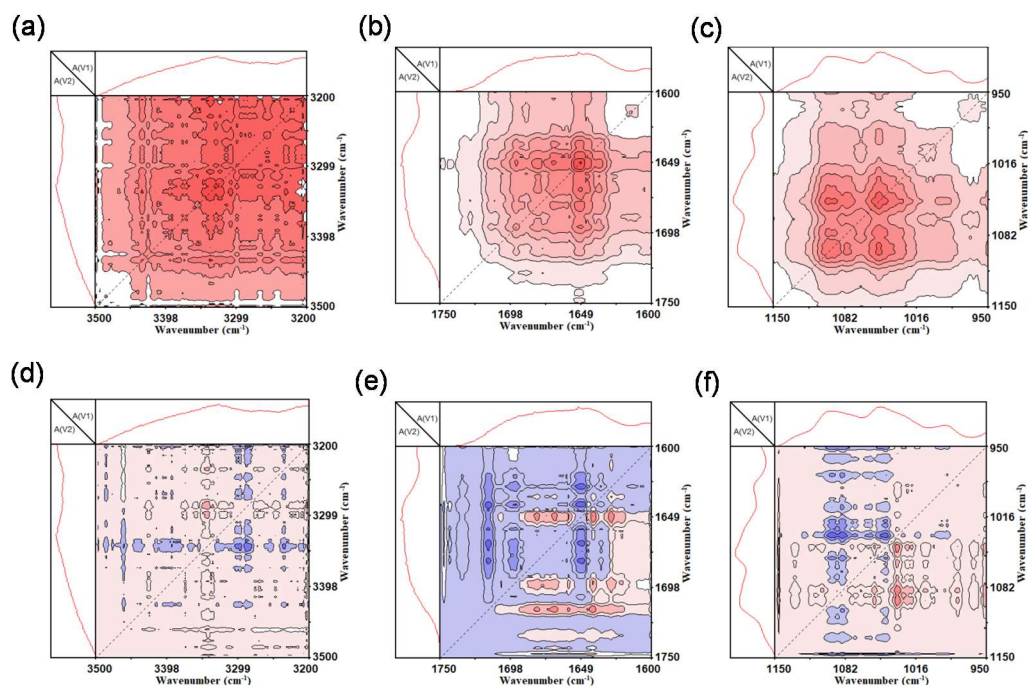

**Figure S20.** Synchronous and asynchronous correlation spectra of **UD** during heating from 20 to 100 °C. (a–c) Synchronous correlation spectra of **UD**. (d–f) Asynchronous correlation spectra of **UD**.

## 12. Density Functional Theory (DFT) simulations

Table S7. Combination Gibbs free energy.

| Compound 1 | Ratio | Compound 2 | Combination Gibbs free energy (kJ/mol) |
|------------|-------|------------|----------------------------------------|
| <b>T</b>   | 1:1   | <b>D</b>   | -134.263                               |
| <b>U</b>   | 1:1   | <b>D</b>   | -129.159                               |
| <b>T</b>   | 1:1   | <b>T</b>   | -138.212                               |
| <b>D</b>   | 1:1   | <b>D</b>   | -168.258                               |
| <b>U</b>   | 1:1   | <b>U</b>   | -124.244                               |

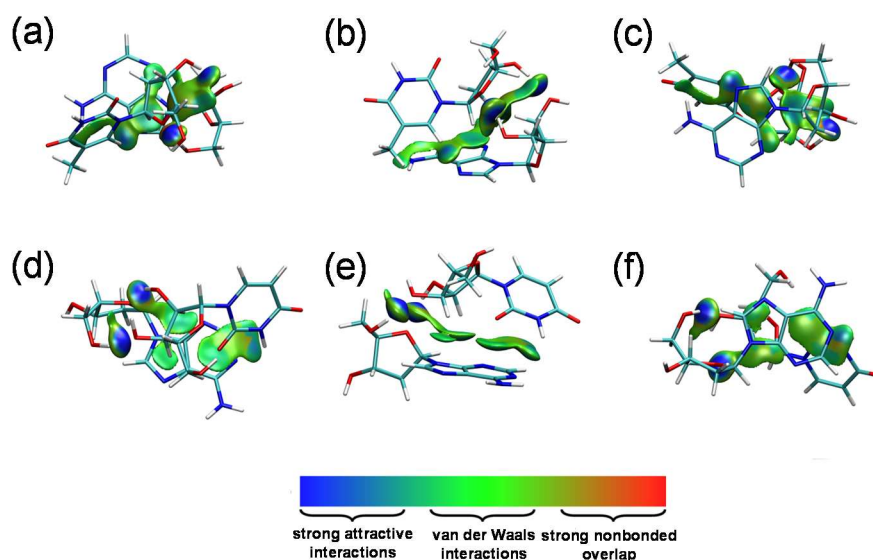

**Figure S21.** (a–c) The independent gradient model (IGM) isosurfaces for the interaction between **T** and **D** (molar ratio 1:1). (d–f) The IGM isosurfaces for the interaction between **U** and **D** (molar ratio 1:1). The color bar shows that blue, green, and red represent strong attraction interactions (hydrogen bonding), van der Waals interactions, and strong nonbonded overlap, respectively.



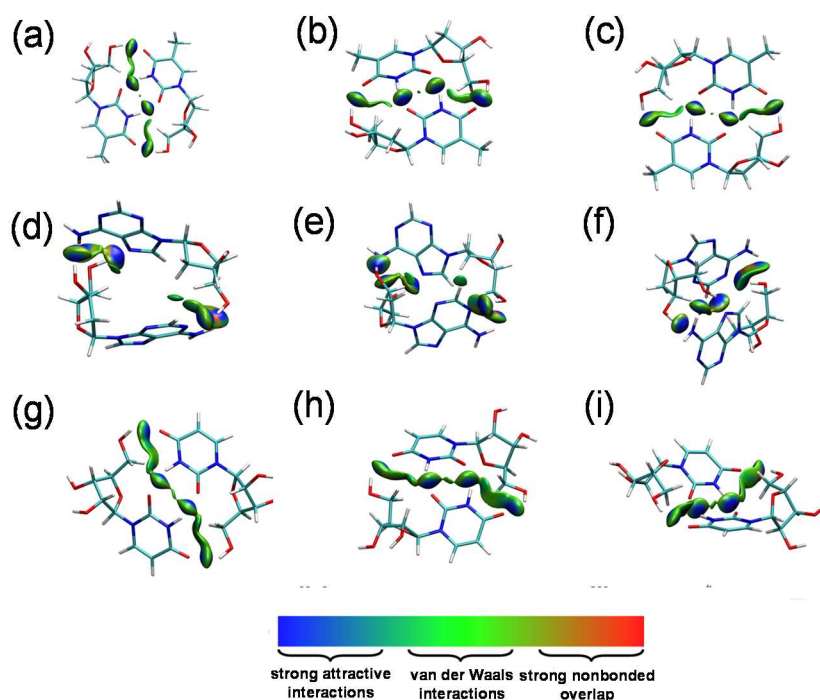

**Figure S22.** (a–c) The IGM isosurfaces for the interaction between **T** and **T** (molar ratio 1:1). (d–f) The IGM isosurfaces for the interaction between **D** and **D** (molar ratio 1:1). (g–i) The IGM isosurfaces for the interaction between **U** and **U** (molar ratio 1:1). The color bar shows that blue, green, and red represent strong attraction interactions (hydrogen bonding), van der Waals interactions, and strong nonbonded overlap, respectively.

### 13. Powder X-Ray Diffraction (PXRD) pattern of BSGs

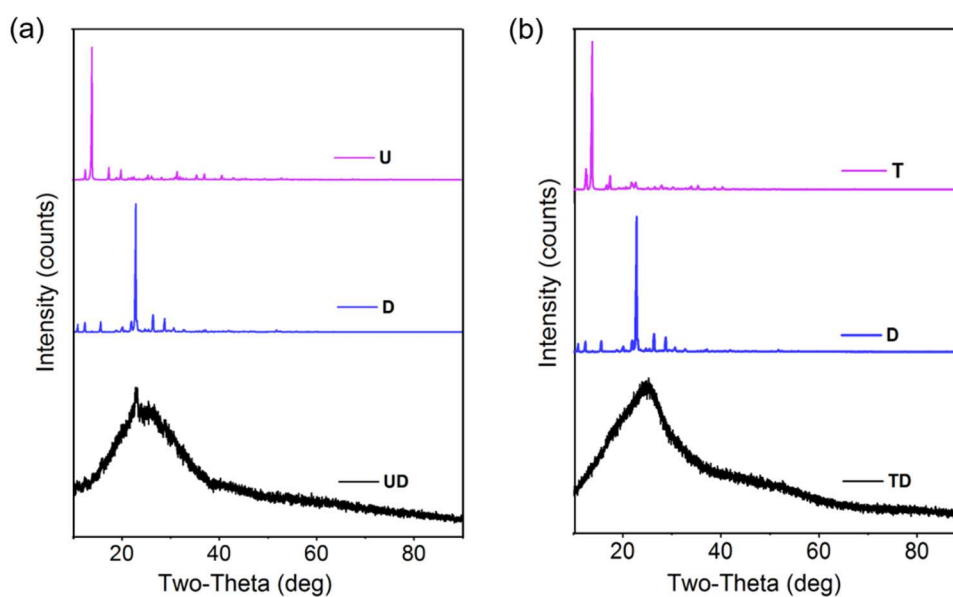

**Figure S23.** PXRD spectra of nucleosides and BSGs. (a) PXRD spectra of **T**, **D**, and **TD**. (b) PXRD spectra of **U**, **D**, and **UD**.

## 14. X-ray photoelectron spectroscopy (XPS) spectra of BSGs

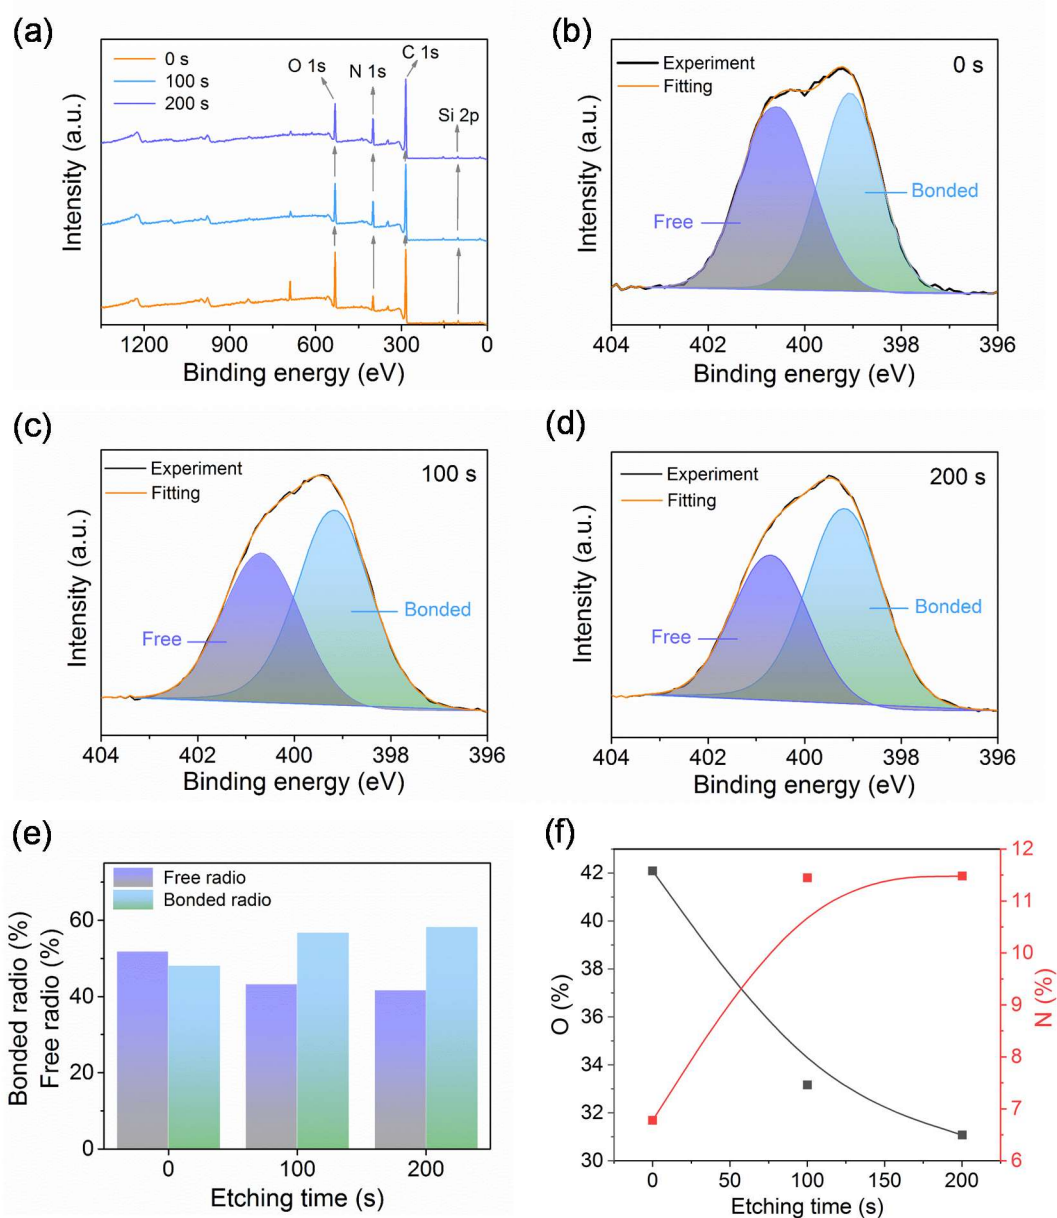

**Figure S24.** XPS spectra of BSGs. (a) Wide-scan XPS spectra of UD after different etching times, (b–d) Common and depth-dependent N 1s narrow scan for UD; (e) Percentage of “free” and “bonded” N-H motifs derived from N 1s narrow scan after different etching times. (f) Percentage of O 1s and N 1s narrow scan after different etching times.

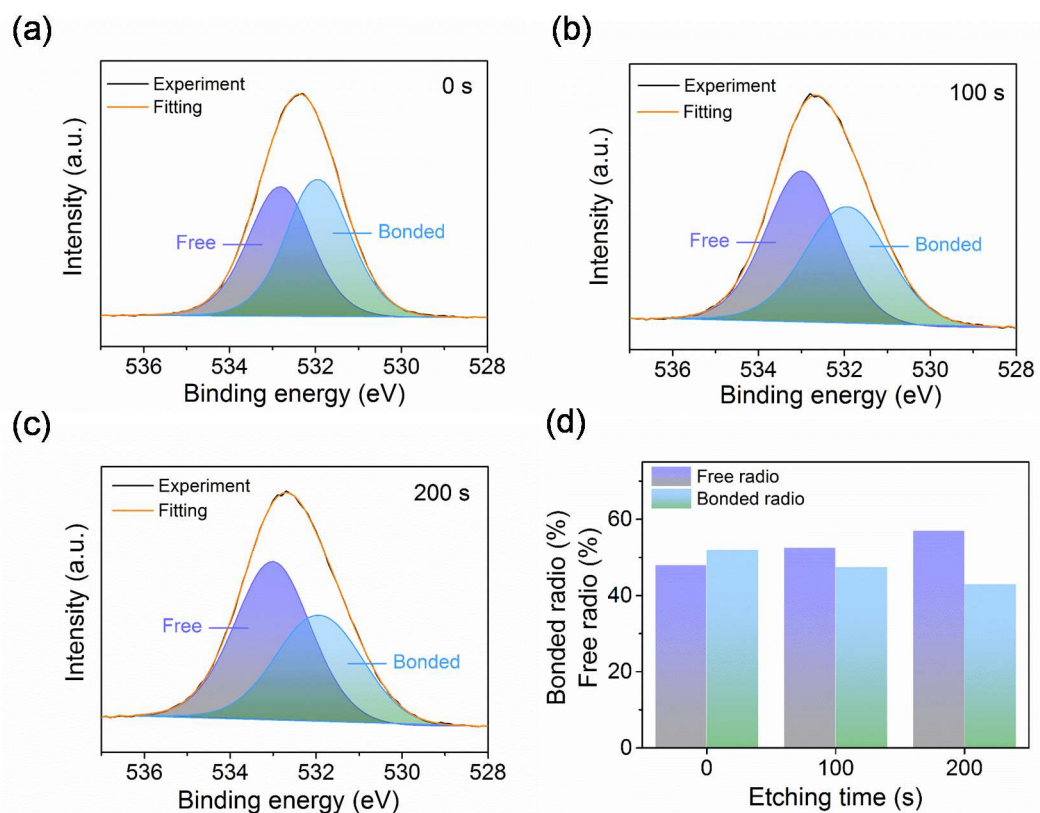

**Figure S25.** XPS spectra of BSGs. (a–c) Common and depth-dependent O 1s narrow scan for UD. (d) Percentage of “free” and “bonded” O-H motifs derived from O 1s narrow scan after different etching times.

## 15. Molecular dynamic (MD) simulations

### *Mechanical properties of BSGs*

**Table S8.** Mechanical properties of TD at room temperature.

|                             | Young modulus (GPa) |      |      |
|-----------------------------|---------------------|------|------|
|                             | X                   | Y    | Z    |
| <b>T+D</b>                  | 6.98                | 4.57 | 5.80 |
| <b>T+D+1H<sub>2</sub>O</b>  | 6.70                | 5.37 | 5.79 |
| <b>T+D+3H<sub>2</sub>O</b>  | 6.72                | 4.97 | 5.41 |
| <b>T+D+10H<sub>2</sub>O</b> | 6.66                | 4.82 | 5.35 |

**Table S9.** Mechanical properties of **UD** at room temperature.

|                             | Young modulus (GPa) |      |      |
|-----------------------------|---------------------|------|------|
|                             | X                   | Y    | Z    |
| <b>U+D</b>                  | 7.68                | 7.84 | 8.02 |
| <b>U+D+1H<sub>2</sub>O</b>  | 7.86                | 6.98 | 7.48 |
| <b>U+D+3H<sub>2</sub>O</b>  | 7.84                | 6.63 | 7.24 |
| <b>U+D+10H<sub>2</sub>O</b> | 8.46                | 6.63 | 5.54 |

***Fraction of free volume (FFV) of BSGs***

$$FFV = V_f/V_{sp} = (V_{sp} - 1.3V_w)/V_{sp}$$

Where  $V_{sp}$  is the cell volume.  $V_w$  is the van der Waals volume obtained from the van der Waals surface.  $V_f$  is free volume.

**Table S10.** *FFV* of **TD** at room temperature.

|                             | Volume<br>( $\text{\AA}^3$ ) | Occupied volume<br>( $\text{\AA}^3$ ) | Free volume<br>( $\text{\AA}^3$ ) | <i>FFV</i><br>(%) |
|-----------------------------|------------------------------|---------------------------------------|-----------------------------------|-------------------|
| <b>T+D</b>                  | 29731.22                     | 27030.9                               | 2700.32                           | 9.08              |
| <b>T+D+1H<sub>2</sub>O</b>  | 30220.59                     | 27384.45                              | 2836.14                           | 9.38              |
| <b>T+D+3H<sub>2</sub>O</b>  | 31079.51                     | 28062.51                              | 3017                              | 9.71              |
| <b>T+D+10H<sub>2</sub>O</b> | 34060.76                     | 30739.21                              | 3321.55                           | 9.75              |

**Table S11.** *FFV* of **UD** at room temperature.

|                             | Volume<br>( $\text{\AA}^3$ ) | Occupied<br>volume<br>( $\text{\AA}^3$ ) | Free volume<br>( $\text{\AA}^3$ ) | <i>FFV</i><br>(%) |
|-----------------------------|------------------------------|------------------------------------------|-----------------------------------|-------------------|
| <b>U+D</b>                  | 28512.42                     | 26098.85                                 | 2413.57                           | 8.46              |
| <b>U+D+1H<sub>2</sub>O</b>  | 28875.87                     | 26545.82                                 | 2330.05                           | 8.07              |
| <b>U+D+3H<sub>2</sub>O</b>  | 29710.9                      | 27097.82                                 | 2613.08                           | 8.80              |
| <b>U+D+10H<sub>2</sub>O</b> | 32808.16                     | 29916.02                                 | 2892.14                           | 8.82              |

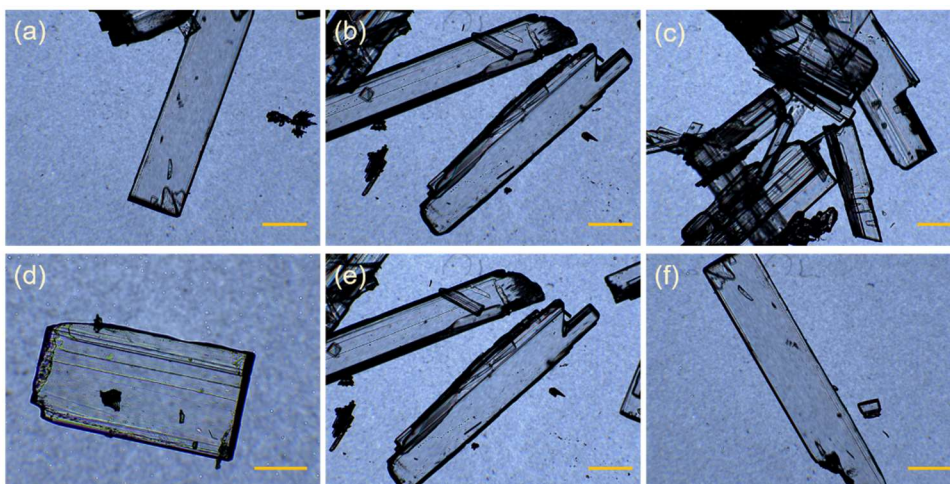

**Figure S26.** Optical microscope images of single crystal T. Scale bar represents 5  $\mu\text{m}$ .
